# Supplementary material for: Epigenetic analysis of regulatory T cells using multiplex bisulfite sequencing
Source: PubMed Central journal article supplement (PMC4832369; doi:10.1002/eji.201545646), 2015-10-01

# Supporting Information

## Methods

A summary of the work flow is shown in Supporting Information Fig. 8.

### 1.1 Subjects

Research involving human participants was approved by the NHS Cambridgeshire Research Ethics Committee. Samples were obtained from the Cambridge BioResource ([www.cambridgebioresource.org.uk](http://www.cambridgebioresource.org.uk)), as part of the 'Genes and Mechanisms of Type 1 Diabetes' study and were of self-reported white ethnicity and informed consent was obtained from all volunteers for the collection and use of the peripheral blood samples. Data and samples are always treated anonymously and confidentially.

### 1.2 Cell sorting

CD4<sup>+</sup> T cells were purified using RosetteSep human CD4<sup>+</sup> T-Cell Enrichment Cocktail (Stemcell Technologies) from blood. The CD4<sup>+</sup> T cells were stained with the following panel of antibodies to surface markers and CD4<sup>+</sup> naïve and memory T cells and Tregs were sorted on an BD FACSAria III: TCRαβ (FITC, clone IP26, BioLegend), CD4 (AF700, clone RPA-T4, BioLegend), CD25 (APC, clones M-A251 and 2A3, BD Biosciences, both clones were added together to increase sensitivity), CD127 (PE-Cy7, clone eBioRDR5, eBioscience), CD45RA (BV785, clone HI100, BioLegend), CD62L (eFluor605, clone DREG56, eBioscience) and Viability Dye (eFluor780, eBioscience). For intracellular staining, FOXP3 (PE, clone 259D, BioLegend) and CTLA-4 (PE-CF594, clone BNI3, BD Biosciences) antibodies were incorporated into the above panel. Supporting Information Fig. 7A exemplifies the initial gating strategy of CD4<sup>+</sup> TCRαβ<sup>+</sup> T cells and Fig. 1 shows the gating of Tregs and naïve and memory effector CD4<sup>+</sup> T cells. Sort purity was determined in a subset of samples and ranged from 98.0-99.9%. We opted for sorting Tregs using cell surface markers rather than FOXP3 primarily due to the reduction in the yields of Tregs caused by the additional washes required for the intracellular staining protocol for the transcription factor. It was shown by Bluestone and colleagues [1] that CD4<sup>+</sup> CD25<sup>+</sup> CD127<sup>-/low</sup> cells are highly enriched for FOXP3<sup>+</sup> cells (86.6%, range 67.4-93.6 for 10 donors – Table 1 in their paper, Ref 1) that mediate suppression (Fig. 7, Ref 1) and other investigators [2] have confirmed their observation. We have confirmed that Tregs, naïve and

memory effector T cells defined by surface markers show differential intracellular expression of FOXP3 with the greatest expression in Treg cells (Supporting Information Fig. 7B). Similarly, a strong correlation between the levels of FOXP3 and CTLA-4 in Tregs has been demonstrated by Miyara et al. [2] and we have confirmed these findings (Supporting Information Fig. 7B).

### **1.3 Multiplex DNA variant sequencing**

rs1800521 is a synonymous SNP (Ala>Ala) located in the *AIRE* (autoimmune regulator) gene on the long arm of chromosome 21. A previous study using a pooled sequencing dataset found association with type 1 diabetes, with the minor allele frequency (MAF) in cases being 0.32 and in controls 0.23, with a Fisher's P value of  $1.8 \times 10^{-5}$  [3]. We had attempted to genotype rs1800521 using a Taqman genotyping assay from Applied Biosystems and Illumina Immunochip, but these methods were unsuccessful, most likely due to the surrounding sequence being GC rich. This SNP was not in high LD with any other SNP so a tag SNP could not be used. Hence, a next generation sequencing approach was developed to genotype the SNP rs1800521 in thousands of samples. We developed an index system that allows up to 960 different samples to be analysed per MiSeq sequencing run. Primers were designed that flank the SNP rs1800521 (Forward – tgtaaacgacgccagtCCGGCATGGACACGACTCTT, reverse – caggaacagctatgaccGTAGGTCCTGGGCTCCTTGA; lowercase letters denote the adaptor sequence to which the second round index primers bind) and a second stage PCR added the index sequence (Supporting Information Table 3) to the adaptor sequence of the first round primer (shown in lowercase). Initially we sequenced DNA samples from 48 type 1 diabetes cases and 48 control samples to confirm the method worked, and the minor allele frequencies (MAF) were 0.375 and 0.277, respectively. We then sequenced a further 2962 cases and 2777 controls and the MAF was 0.369 and 0.368, respectively. Therefore, there was no evidence of association of SNP rs1800251 with type 1 diabetes.

### **1.4 DNA extraction and bisulfite conversion**

Samples with fewer than 100,000 cells were processed in a one step cell lysis and bisulfite conversion using Qiagen Epitect lyse all kit. For samples with greater than 100,000 cells, the DNA was first extracted using Qiagen QIAMP DNA micro kit. A maximum of 500 ng DNA was bisulfite treated using a Qiagen Epitect Fast DNA bisulfite kit. Bisulfite-converted DNA was quantified using a nanodrop with the single strand DNA setting. Supporting Information Fig. 5B shows the amount of DNA extracted from various cell inputs. For all steps lo-bind

DNA tubes (Eppendorf) were used to reduce the loss of DNA, especially from low cell input samples from adsorption onto the tube wall.

### **1.5 First round PCR primer design**

The DNA sequence from the region of interest was downloaded from Ensembl ([http://www.ensembl.org/Homo\\_sapiens/Info/Index](http://www.ensembl.org/Homo_sapiens/Info/Index)) and all the C bases were changed to T, unless they were paired to a G in which case they were flanked by square brackets, such that in the primer design program, Primer 3 (<http://bioinfo.ut.ee/primer3-0.4.0/primer3/>), the primers were forced to surround the methylation sites. Standard primer picking conditions we used, except optimal primer length was increased to 24 bp. Adaptor sequences were added to the gene-specific primers, shown as lowercase letters (Supporting Information Table 4). For the *FOXP3* TSDR, primers were designed to capture the same nine CpG sites that were targeted by published qPCR assays [4], however due to sequence restrictions of primer design we captured an additional CpG site which was analysed (Supporting Information Fig. 1), but this site was dropped from our analysis when calculating the percent *FOXP3* demethylation as it showed an inconsistent methylation pattern (see section 1.14 Methylation-based cell quantification for more details).

### **1.6 First round PCR**

The first round PCR contains 10 µl of Qiagen multiplex PCR mastermix, 0.5 µl of 10 nmol forward primer, 0.5 µl of 10 nmol reverse primer, 2 µl of bisulfite DNA (4-8 ng) and made up to 20 µl with ultra-pure water. The PCR cycling conditions were 95°C for 15 minutes hot start, followed by 25 cycles of the following steps: 95°C for 30 seconds, 60°C for 90 seconds and 72°C for 60 seconds, finishing with a 72°C for 10 minutes cycle. Primers used to interrogate *FOXP3* and *CTLA4* are detailed in Supporting Information Table 4. The 5' end of the gene-specific primers are tagged with M13F and M13R sequences (shown as lowercase in Supporting Information Table 4) to which the second round PCR primers anneal. All the regions described in this paper have been multiplexed from the same sample, using 2000 – 4000 cells per reaction (4-8 ng bisulfite DNA (Supporting Information Fig. 5B)) with six independent PCR and sequencing reactions performed. This is a much more feasible range for clinical samples, compared to 30 ng per replicate per gene reported for qPCR [4]. A similar input has been used with Sanger sequencing, but has the disadvantage of not being able to multiplex PCR [5].

### **1.7 Ampure XP PCR cleanup**

Ampure XP beads (Beckman Coulter) were used to purify the PCR products at the end of the first round PCR. To the 20 µl PCR reaction, 36 µl Ampure XP beads were added and incubated for 5 minutes. Two washes with 70% ethanol followed and the DNA was eluted in 20 µl of ultra-pure water. Only 18 µl of sample was collected to reduce the carryover of Ampure beads.

### **1.8 Second round PCR**

To add Illumina sequence compatible ends to the individual first round PCR amplicons, additional primers were designed to incorporate P1 and A sequences plus sample-specific index sequences in the A primer, through hybridisation to the M13 tag sequences present on the first round gene-specific primers. Index sequences were designed using a bespoke Perl script to be 9 bp in length, without polynucleotide repeats and lack any significant secondary structure or homology to the P1 or A ends. The index sequences used are listed in Supporting Information Table 5.

The second round PCR contains 7.5 µl of Qiagen multiplex PCR mastermix, 2.5 µl of ultra-pure water, 0.5 µl of each forward and reverse index primer, 4.5 µl of Ampure XP-cleaned first round PCR product. The PCR cycling conditions were 95°C for 15 minutes hotstart, followed by 7 cycles of the following steps: 95°C for 30 seconds, 56°C for 90 seconds, 72°C for 60 seconds, finishing with 72°C for 10 minutes cycle.

### **1.9 Pooling PCR products**

All PCR products were run on a Shimadzu Multina to quantify the amount of product. Equimolar amounts of PCR product were pooled into a single tube, and Ampure XP beads were used to remove unincorporated primers and to concentrate the pooled sample, which was eluted in ultra-pure water.

### **1.10 Library quantification**

To accurately quantify the library for sequencing we used the Kapa Bioscience library quantification kit, according to manufacturer's instructions. In brief, the library was diluted to 10 nM, based on Qubit (Life Technologies) quantification, and this was diluted 1:1000, 1:2000, 1:4000 and 1:8000, which was used as the template for qPCR run on an Applied

Biosystems 7900HT, and compared to a standard curve at dilutions from 20 pmol to 0.0002 pmol.

### **1.11 Sequencing**

The library was sequenced on an Illumina MiSeq using either v2 reagents (2 x 250 bp reads) or, since their release in December 2013, v3 reagents (2 x 300 bp reads). PhiX was spiked into the sequencing run at 5 % to add diversity. MiSeq output using V3 reagents is approximately 25 million paired end reads per run.

### **1.12 Data processing**

The raw FASTQ data files from the Illumina Miseq were demultiplexed using Novobarcode (<http://www.novocraft.com>). The forward and reverse FASTQ files were split into a unique file for each of the index sequences used (up to 960). Trimmomatic version 0.27 [6] was used to trim the adaptor sequence (HEADCROP:18), trim the end of the read when the quality score dropped below 20 (TRAILING:20) and a sliding window trimming was performed when the average base quality of four continuous bases fell below 20 (SLIDINGWINDOW:4:20). Next, Cutadapt version 1.2.1 [7] was used to remove the Illumina adaptor sequence. Given our targeted sequences are quite short (e.g. 218 bp for *FOXP3* TSDR) compared to the read length (250 bp), there are overlaps between forward and reverse reads. Therefore, they were stitched together and where the reads overlapped, the base with the higher quality score was kept using FLASH-1.2.4 [8]. Bowtie 2 [9] was used to align each stitched sequence read to our customized gene reference sequence with the options --phred33 --np 0 --no-unal --no-head --local. Indels were adjusted properly before the CpG sites were called using an in-house python script, which deletes the insertions and adds an ambiguous letter “D” if there is a deletion. The pipeline to perform all these steps is available from <https://github.com/XinYang6699/Methpup>. Bisulfite conversion efficiency was assessed by counting the number of C bases present outside of CpG sites, which should have been converted to T by the bisulfite treatment, and was greater than 99% (Supporting Information Fig. 5A).

### **1.13 Methylation profile visualization**

R was used to read and visualize the processed data as a two-dimensional barcode. Our visualization functions are available in the R package: Methplot (<http://cran.r-project.org/web/packages/Methplot/index.html>).

### **1.14 Methylation-based cell quantification**

In calculating the percentage of TSDR reads that are demethylated, the most proximal CpG site (called sA in Supporting Information Fig. 1) was excluded from our analysis as it showed a demethylation pattern not consistent with the other nine CpG sites analysed, which has been reported previously [4, 5, 10] and the proportion of demethylation was greater in DNA from females (Supporting Information Fig. 1). We classified Tregs as having 8 or 9 of the CpGs sequenced demethylated, as when we counted the numbers of reads with 0, 1, 2, . . . . ., 9 sites demethylated we see that in sorted Tregs there are some reads with 8 sites and most reads with 9 sites demethylated, but very few reads with between 3 and 7 CpG sites demethylated (Supporting Information Fig. 2A). In sorted naïve and memory CD4<sup>+</sup> effector T cells, the opposite pattern is seen with >97.7% of the reads having 0, 1 or 2 CpG sites demethylated (Supporting Information Fig. 2B, C). The same analysis was performed for *CTLA4* (Supporting Information Fig. 2D-F and Supporting Information Table 2), and we found that although Tregs were preferentially demethylated at all seven CpGs (>90% of sorted Tregs), ~30% of memory cells and ~5% of naïve cells were demethylated to this extent.

### **1.15 Cell input titration**

To determine the lower input level for the multiplexed bisulfite sequencing assay, Tregs, memory and naïve CD4<sup>+</sup> T cells as well as total CD4<sup>+</sup> T cells were sorted. To increase the accuracy of the experiment, the BD FACSAria III sorter counted and collected between 60,000 and 750 cells per tube from each of the four cell populations and bisulfite DNA was prepared. Six PCR replicates were performed per sample so that bisulfite DNA prepared from a maximum of 10,000 and a minimum of 125 cells was used as the template for the multiplexed bisulfite sequencing reaction. The results show that between 2,000 and 6,000 cells there was very little difference in the levels of methylation, however below 2,000 cells per PCR replicate, variation amongst the replicates increased, which was especially noticeable when low levels of demethylation were present (Supporting Information Fig. 4). The 10,000 cells per PCR replicate also had some variation of replicates most likely due to overloading the PCR reaction.

### **1.16 Methylation-based cell quantification**

To assess the accuracy of the multiplexed bisulfite sequencing assay, various proportions of Tregs and naïve CD4<sup>+</sup> T cells were sorted using the BD FACSAria III so that in total 20,000

cells were collected per point. Bisulfite DNA was made from the cells collected and six PCR replicates were performed per sample so that 3,300 cells were used per PCR reaction. The 100% Treg sample had 82.3% reads demethylated at the *FOXP3* TSDR. The data demonstrate that for both the *CTLA4* exon 2 ( $r^2=0.998$ ) and the *FOXP3* TSDR ( $r^2=0.994$ ) sequencing assay there is linearity at all points analysed (Supporting Information Fig. 3).

## References

- 1 **Liu, W.** *J Exp Med* 2006. **203**: 1701-1711.
- 2 **Miyara, M.** *Immunity* 2009. **30**: 899-911.
- 3 **Yang, X.** *Bioinformatics* 2012. **28**: 2898-2904.
- 4 **Wieczorek, G.** *Cancer Res* 2009. **69**: 599-608.
- 5 **Spreafico, R.** *Eur J Immunol* 2014. **44**: 3141-3143.
- 6 **Bolger, A. M.** *Bioinformatics* 2014. **30**: 2114-2120.
- 7 **Martin, M.** *EMBnet.journal* 2011. **17**: 10-12.
- 8 **Magoc, T.** *Bioinformatics* 2011. **27**: 2957-2963.
- 9 **Langmead, B.** *Nat Methods* 2012. **9**: 357-359.
- 10 **Baron, U.** *Eur J Immunol* 2007. **37**: 2378-2389.

**Supplemental table 1:** The data that were used to generate Supplemental figure 1, showing the percentage of reads with any number of CpG sites demethylated within the *FOXP3* TSDR in CD4<sup>+</sup> naïve and memory T cells and Tregs.

| Sample          | Sex    | 9T    | 8T       | 7T   | 6T   | 5T   | 4T   | 3T   | 2T   | 1T       | 0T    | % Tregs             | Read number |
|-----------------|--------|-------|----------|------|------|------|------|------|------|----------|-------|---------------------|-------------|
| Tregs*          | Female | 41.81 | 2.50     | 0.60 | 0.38 | 0.22 | 0.39 | 1.21 | 4.60 | 16.25    | 32.90 | 88.31 (79.68-94.54) | 27803       |
| Tregs           | Female | 38.35 | 1.58     | 0.22 | 0.04 | 0.07 | 0.07 | 0.42 | 3.49 | 15.60    | 39.95 | 80.55 (56.49-89.24) | 110083      |
| Tregs*          | Male   | 76.83 | 9.22     | 1.17 | 0.18 | 0.04 | 0.07 | 0.67 | 1.08 | 3.14     | 7.01  | 85.99 (82.61-87.31) | 25184       |
| Tregs           | Male   | 60.11 | 1.91     | 0.02 | 0.14 | 0.03 | 0.00 | 0.08 | 3.53 | 7.09     | 29.53 | 61.83 (51.20-76.41) | 6003        |
| Memory T cells* | Female | 0.75  | 0.16     | 0.10 | 0.04 | 0.17 | 0.18 | 0.96 | 5.33 | 23.91    | 67.81 | 1.84 (1.06-3.16)    | 29330       |
| Memory T cells  | Female | 0.12  | 0.00     | 0.00 | 0.00 | 0.02 | 0.04 | 0.43 | 2.81 | 22.22    | 74.59 | 0.24 (0.00-0.96)    | 118935      |
| Memory T cells* | Male   | 1.46  | 0.17     | 0.18 | 0.03 | 0.00 | 0.15 | 0.61 | 2.15 | 18.46    | 74.15 | 1.93 (1.29-5.07)    | 23308       |
| Memory T cells  | Male   | 1.50  | 0.00     | 0.00 | 0.00 | 0.00 | 0.00 | 0.00 | 1.75 | 18.92    | 76.38 | 1.50 (0.44-2.35)    | 3244        |
| Naïve T cells*  | Female | 0.12  | 0.01     | 0.00 | 0.00 | 0.00 | 0.00 | 0.29 | 2.96 | 20.74    | 76.02 | 0.29 (0.00-0.49)    | 25398       |
| Naïve T cells   | Female | 0.00  | 0.00     | 0.00 | 0.00 | 0.00 | 0.00 | 0.08 | 1.92 | 18.57    | 79.35 | 0.00 (0.00-0.05)    | 92288       |
| Naïve T cells*  | Male   | 0.14  | 0.00     | 0.00 | 0.00 | 0.00 | 0.00 | 0.11 | 1.84 | 18.52    | 79.55 | 0.15 (0.00-0.67)    | 26146       |
| Naïve T cells   | Male   | 1.23  | 0.00     | 0.00 | 0.00 | 0.00 | 0.00 | 0.00 | 1.61 | 20.21    | 76.65 | 1.68 (0.00-2.24)    | 4958        |
| <b>Comments</b> |        |       | <b>A</b> |      |      |      |      |      |      | <b>B</b> |       | <b>C</b>            | <b>D</b>    |

**A** = Reads with 8 CpGs demethylated represent the laddering pattern seen in CD4<sup>+</sup> Tregs (Fig 1B and C left hand panel).

**B** = Reads with 1 CpG site demethylated represents the laddering pattern seen in non-Tregs (naïve and memory CD4<sup>+</sup> T cells, Fig 1B and C right hand panels).

**C** = Percentage Treg calculated as the number of sequencing reads with 8 or 9 CpG sites demethylated divided by the total number of reads. For samples from female donors, the percent Treg value has been multiplied by two, to account for X chromosome inactivation. Between 4 and 8 PCR replicates was performed per sample and the data shown is the median (with range).

**D** = The read number is the sum of the reads analysed from all PCR replicates. The number of reads obtained per sample is dependent on the number of samples analysed and the number of genes multiplexed per sequencing run.

\* = Indicates the samples that are depicted in Figure 1.



**Supplemental table 2:** The data that was used to generate Supplemental figure 3, showing the percentage of reads with any number of CpG sites demethylated within *CTLA4* exon 2 region in CD4<sup>+</sup> naïve and memory T cells and Tregs.

| Sample          | Sex    | 7T                  | 6T    | 5T    | 4T   | 3T   | 2T   | 1T    | 0T    | Read number |
|-----------------|--------|---------------------|-------|-------|------|------|------|-------|-------|-------------|
| Tregs           | Female | 90.61 (89.65-91.97) | 6.78  | 1.03  | 0.72 | 0.43 | 0.22 | 0.15  | 0.36  | 6756        |
| Tregs           | Female | 93.04 (89.39-96.01) | 5.98  | 0.14  | 0.06 | 0.01 | 0.00 | 0.04  | 0.00  | 44362       |
| Tregs*          | Male   | 91.25 (88.04-94.30) | 7.14  | 0.75  | 0.00 | 0.00 | 0.00 | 0.00  | 0.10  | 8601        |
| Tregs           | Male   | 92.30 (80.33-98.25) | 2.87  | 0.20  | 1.14 | 0.00 | 0.20 | 0.69  | 0.00  | 1368        |
| Memory T cells  | Female | 21.43 (20.59-23.21) | 11.20 | 10.55 | 8.56 | 9.17 | 9.82 | 13.26 | 14.25 | 8243        |
| Memory T cells  | Female | 28.20 (22.60-34.33) | 13.62 | 10.33 | 7.90 | 8.98 | 9.31 | 10.27 | 11.43 | 49423       |
| Memory T cells* | Male   | 27.05 (24.76-30.33) | 16.99 | 11.80 | 9.83 | 8.94 | 9.07 | 8.51  | 7.19  | 6217        |
| Memory T cells  | Male   | 37.97 (26.99-48.43) | 14.56 | 10.18 | 4.72 | 8.18 | 6.64 | 9.49  | 5.66  | 860         |
| Naïve T cells   | Female | 0.06 (0-0.19)       | 0.07  | 0.24  | 0.71 | 0.84 | 4.10 | 21.54 | 71.60 | 13796       |
| Naïve T cells   | Female | 0.00 (0.00-0.00)    | 0.00  | 0.00  | 0.00 | 0.25 | 2.24 | 14.59 | 81.94 | 14353       |
| Naïve T cells*  | Male   | 0.31 (0-0.90)       | 0.23  | 0.65  | 1.10 | 1.17 | 5.17 | 19.86 | 71.26 | 10207       |
| Naïve T cells   | Male   | 4.87 (0.70-9.02)    | 5.14  | 0.51  | 1.88 | 0.00 | 2.10 | 12.67 | 73.98 | 1253        |
| <b>Comments</b> |        | <b>A</b>            |       |       |      |      |      |       |       | <b>B</b>    |

**A** = The percentage of reads which have all seven CpG sites within the *CTLA4* exon 2 region that are fully demethylated, data is the median with range.

**B** = The read number is the sum of the reads analysed from all PCR replicates. The number of reads obtained per sample is dependent on the number of samples analysed and the number of genes multiplexed per sequencing run.

\* = Indicates the samples depicted in Figure 2.

**Supplemental table 3:**

A list of the 480 index sequences used. Each index was synthesised either on the forward or reverse adaptor sequence creating a total of 960 combinations.

| <b>Index sequence</b> | <b>Index sequence</b> | <b>Index sequence</b> | <b>Index sequence</b> |
|-----------------------|-----------------------|-----------------------|-----------------------|
| ACACGAGGA             | GACAGTGAG             | AATTAGCGT             | CCCAGGTAG             |
| ACAGCTTGA             | GACTGAGTC             | AATTGCAGT             | CAAGAGAGT             |
| ACATATGCG             | GAGAGCTTC             | AAATACGCT             | CATTGGAAT             |
| ACGACTAAT             | GAGCGCTAT             | AATGGATAG             | CACATACGA             |
| ACGTCGCAG             | GAGTGAGAT             | AACAAAGGC             | CTAAGTCTC             |
| ACTAGTCAG             | GATATAGTC             | AACTGGTGC             | CTTCAATCA             |
| ACTCCGTAT             | GATCTAGAT             | ATAATTCAG             | CTGATCGTT             |
| ACTGTGATG             | GATGCTGCG             | ATTGACCGA             | CTCACGCTA             |
| AGACTTGCA             | GCTAGTAC              | ATCAGACGC             | TAAACTACA             |
| AGAGATATG             | GCAGTCGAT             | AGAACTGCC             | TAATACTTC             |
| AGATAGGTA             | GCATATATA             | AGTACGCAC             | TTGAGGTGC             |
| AGCAGTCAC             | GCGAGAGAC             | AGGCGCGTC             | TGGATAATC             |
| AGCTGCATA             | GCGTCGAAT             | AGCGAGTTC             | TCTACAATT             |
| AGTACGATT             | GCTAGATGC             | ACACTCCAT             | TCGCACCTA             |
| AGTCGTAGC             | GCTCTGTG              | ACTTCGGAA             | TCCAACAT              |
| AGTGACGTC             | GCTGTGCAG             | ACGTGCTGG             | TAAGATCAC             |
| ATACGTATA             | GTACGTAGC             | ACCTACCTG             | TTACCAGT              |
| ATAGTGAAG             | GTAGTACGC             | AATTCCTCA             | TGCTACTTA             |
| ATATCGCTC             | GTATACGCA             | AAACTAAGG             | TCAGCAGGT             |
| ATCACATGG             | GTCATGCAA             | AATCGCTCT             | TCTTCGAGT             |
| ATCTAGTGG             | GTCTATCTA             | AAGCCTATG             | TCGTAGTTC             |
| ATGAGATGA             | GTGAGTGTC             | AACGGCCTG             | TCCTCCAGA             |
| ATGCAGCAC             | GTGCTGATA             | ATAAGCTGT             | GAAAGTATG             |
| ATGTGCTCT             | GTGTAGTCA             | ATTCATGTT             | GAATCTTAA             |
| CACAGACCG             | TACACTCAC             | ATGCAGAGG             | GATTATGTA             |
| CACTAGATG             | TACTCATGC             | ATCGCATT              | GAGGCCAGG             |
| CAGACAGAG             | TAGTACAGT             | AGCACTAGC             | GACGAACCT             |
| CAGCAAGTC             | TAGCGTAAT             | AGGAGAGTT             | GTACGGTAC             |
| CAGTCTACT             | TAGTCACGA             | AGGTGTGGA             | GTTTCGACTT            |
| CATACGATG             | TATATCTAC             | ACAATCCTC             | GTGACTAGC             |
| CATCTATGC             | TATCAGAGT             | ACTCCCTTC             | GTCACAAA              |
| CATGTCTTA             | TATGACATA             | ACGGCACTG             | GTCTCATGT             |
| CGACATAGC             | TCACATTCA             | ACCCATATC             | GGAGATAAC             |
| CGAGCGCGT             | TCAGTGCTT             | CAAATCTGG             | GGTCATTGA             |
| CGATCTCTG             | TCATATCTG             | CATAGTCGA             | GGGAGAGGA             |
| CGCAGTGAT             | TCGAACTAG             | CAGCGGCTA             | GGGTACACT             |
| CGCTATCAT             | TCGTATGAG             | CACCTCCTT             | GGCGCGTCG             |
| CGTATCATC             | TCTAGCAAG             | CTAGTAGTG             | GCACCAGCA             |
| CGTCTGTAT             | TCTCAGATC             | CTTGTAATT             | GCTCACATT             |
| CGTGTAGAC             | TCTGAAGAT             | CTGGATACA             | GCGAATCGT             |
| CTACTCAGT             | TGACGTACA             | CTCCAGTAT             | GCGTACCGA             |
| CTAGCATGA             | TGAGTCAAT             | CGACACTGG             | GAAGATCTT             |
| CTATGCTAC             | TGATGCATG             | CGTGATCAA             | GATCATCCT             |
| CTCAGTAGA             | TGCATTCGT             | CGGGAGCCT             | GAGCATTCA             |
| CTCTGCACA             | TGCTTAGTC             | CGCGTCACT             | GACCAGATC             |
| CTGATGAAT             | TGTATGATA             | CCAGCAACG             | GTAAGATCT             |
| CTGCTGTGC             | TGTCGCGAG             | CCTCTCAGA             | GTAAACCTC             |
| CTGTAGAGC             | TGTGTAGTG             | CCGCATATT             | GTTTCACTA             |
| ATGACTTCC             | CCATGCCCG             | CGGCAACCA             | CTTAGCTCG             |
| ATTCACTAT             | CCCAGAGGC             | CGGCGACAC             | CTTCAGAAG             |
| CAAACTTCC             | CCCTCAAAT             | CGGTTCAGG             | CTTGCTCCT             |
| CAAGAATTC             | CCGATCTGC             | CGTACTGAA             | GAACGAACG             |
| CAATCAGCA             | CCGATCAG              | CGTCATTAC             | GACACTGGT             |
| CACCAGCAG             | CCTCAGCGT             | CTACGGCCT             | GAGATGCCT             |
| CACTCTCTC             | CCTTAGCTG             | CTCAGCATT             | GATAGCCTA             |
| CAGAGTTCA             | CGAACGGTT             | CTCCACATG             | GCAATACCA             |
| CAGTGGTGT             | CGAATCTCT             | CTCTCAACG             | GCAGAGCAA             |
| CATTCAGTC             | CGATAGTGC             | CTGAGTTAG             | GGCTCAATA             |
| CCAACTTGT             | CGCCAATAA             | CTGCGGGAC             | GGGCGGTTT             |
| CCACAATCT             | CGCCAGGAC             | CTGCTTAAC             | GGGGATGTA             |

**Index sequence**

AATTAGTTG  
AATTGGGTT  
AAATCTGTA  
AAGACCTGC  
AACATGTGT  
ATAACCAAC  
ATTACAAGC  
ATTGCGTGA  
ATCATCTCA  
AGAATGTTC  
AGTCAGGCT  
AGGGGCAGT  
AGCGTCTAA  
ACAGACCTA  
ACGAGGTCT  
ACCAAGCCG  
ACCTAGACA  
AATTCTCGC  
AAAGCATCT  
AATCGTGAT  
AAGTAGGAC  
AACGGTCGT  
ATAAGGACA  
ATTGAGGCC  
ATGGAATAG  
ATCGTTAGG  
AGCAGGATG  
AGGAGTACG  
AGCCTAAGC  
ACAATTTCT  
ACTGACTCT  
ACGGCATGT  
ACCGTACCC  
CAACAACAT  
CATCTGGCC  
CAGGCAATC  
CACGCTGCT  
CTATCGACT  
CTTTACGTA  
CTGGTGGCA  
CTCGATATC  
CGAGACCGC  
CGTTAGACA  
CGGGGATCC  
CGCGTTCTA  
CCAGCTATT  
CCTGACAAA  
CCGCGATAG  
AATTCAGGT  
GCGCGCATA  
GCGGACTGC  
GCGGTTTAA  
GCTAGAGCT  
GCTGTCAGG  
GCTTACAAG  
GCTTAGGAC  
GGAATCGAG  
GGACGCCAC  
GGATAGTAA  
GGCATTGTA

**Index sequence**

CCCACCCA  
CGTAACGCG  
CGGAGCCTA  
CGCACGGCG  
CCAATACAG  
CCTACACTG  
CCTTATGGT  
CCGTAGGAT  
TAAAGCAGA  
TTATATACC  
TTGATACGG  
TCAAGAATC  
TCTCAGTCG  
TCGCACGCT  
TCCCATACG  
TAAGCACCA  
TTCATAGTT  
TGCTGAAGC  
TCACTGGAC  
TCTTGCGAT  
TCGTGATCT  
TCCTCGTAG  
GAAATCACT  
GAATGTACT  
GATTTCAAA  
GAGTAACT  
GACGACTAC  
GTAGACCGT  
GTTGACAAT  
GTGCAAGCT  
GTCACCGTC  
GTCTCGCAC  
GGAGATTGG  
GGTCTAGTA  
GGGAGGCAT  
GGGTACGAA  
GGCGTCAA  
GCACGACAT  
GCTCCAGAG  
GCGACACGC  
GCGTCACT  
GGACACCTG  
GGTAACGGA  
GGTTACCTT  
GGGGAGATC  
GGCCAGAGG  
GCAAGTCAC  
GCATCTCGC  
GGTGCAGCC  
GGTTGTTCT  
GTAACAGTT  
GTCCGTATT  
GTCGTGAGT  
GTGGAACGA  
GTTAACACG  
GTTTAGGTG  
TAACGCGCG  
TCACCTGAT  
TCCACCGCG  
TCCACGTCA

**Index sequence**

AATTATCAG  
AATTGTTGA  
AATATACGC  
AAGAGACGT  
AACGATGCC  
ATAACGGGG  
ATTACACTT  
ATGAACTAC  
ATCCGCGAG  
AGATTGTGT  
AGTCCTCAT  
AGGGTACCT  
AGCTATAGT  
ACAGAGTCC  
ACGCACCAG  
ACCAGGAGA  
AAAGGACCG  
AATGATTAT  
AAGTCACAT  
AACTCAGTG  
ATAATGTAT  
ATTCTACAT  
ATGGCGGCC  
ATCTAAGAC  
AGTAATCGT  
AGGCAGAAT  
AGCCTTCTG  
ACACGTCCG  
ACTTAACAA  
ACGTCTATC  
ACCGTGTGG  
CAACGAGAG  
CATGCCTAT  
CAGGTTCCC  
CACGGTGTG  
CTTAGACCT  
CTTTATACG  
CTGTGATTC  
CTCGCTAAT  
CGAGGTGTT  
CGTTACTA  
CGGGTCCCT  
CGCTCACAC  
CCATCCTGA  
CCTGATACT  
CCGGAGTCA  
CCCGATTGC  
CAATACTAA  
TCGAAGGGA  
TCGGCCACT  
TCTGTACCG  
TGCAGGTAC  
TTCAAGCTC  
AAACATACC  
AACGCAACC  
AAGCACTTG  
AATATATTA  
ACATACGGC  
ACCCAGTTT  
ACGCATGGT

**Index sequence**

CAGAGTATT  
CACATCAAG  
CTAATCACC  
CCGACAGCA  
CCGTATCGC  
CCCTGCGTG  
CTCTCTGAG  
CCCTGACTA  
CCTATACGT  
TAACCTTGC  
TTATATTAT  
TGAGCTCTT  
TCAAGTAGT  
TCTGCTGGC  
TCGGAACAC  
TCCGAATTC  
TAATACACA  
TTCGACCTG  
TGGAGACCT  
TCATCATTG  
GAACATAGA  
GATACACCA  
GAGAACTAA  
GACACGAGA  
GACTGCCAG  
GTATCGTGA  
GTTGATATA  
GTGCACGGC  
GTCCAATTC  
GGAACGACA  
GGATACGTC  
GGTGACCCA  
GGGCCTTCT  
GGCAGGCTC  
GGCTACTGG  
GCAGAACTC  
GCTGCAATA  
GCCGAGCCG  
GAAGCTGGA  
GATGTTTGC  
GAGGAGCGT  
GACCGATGT  
GTACACCAA  
GTTCATACC  
GTGAATTTA  
GTGTGACAC  
GTCGTGCTC  
GTGGATAGG  
AGCACCGTG  
AGGTGGTAG  
AGTGTACA  
ATAACTATG  
ATCTACCG  
ACTACATCC  
TCCGACTAT  
GGCCATCAG  
GGTACAAGG  
CTGTGGTAA  
CGGACTCTC  
CCACGTGTC

**Supplemental table 4:** Sequencing primers used in this study for methylation analysis. Lower case letters denote the adaptor sequence to which the second round index primers bind.

| <b>Assay</b>           | <b>Forward</b>                           | <b>Reverse</b>                              | <b>Size (bp)</b> |
|------------------------|------------------------------------------|---------------------------------------------|------------------|
| <i>FOXP3</i><br>TSDR   | tgtaaacgacggccagtTTGAATGGGGGATGTTTTTG    | caggaaacagctatgaccAAAATATCTACCCTCTTCTCTCCTC | 209              |
| <i>CTLA4</i><br>exon 2 | tgtaaacgacggccagtGTGGTTTAGTTTGTGTGGTATTG | caggaaacagctatgaccCTCCACCTTACAAATATAAAATCCC | 315              |

## Supplemental figure 1

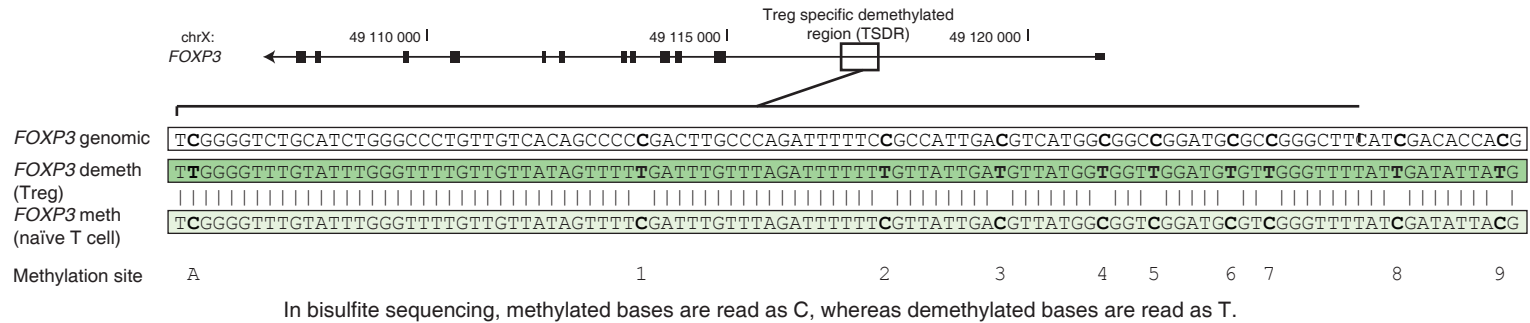

### Male donor - 10 sites analysed

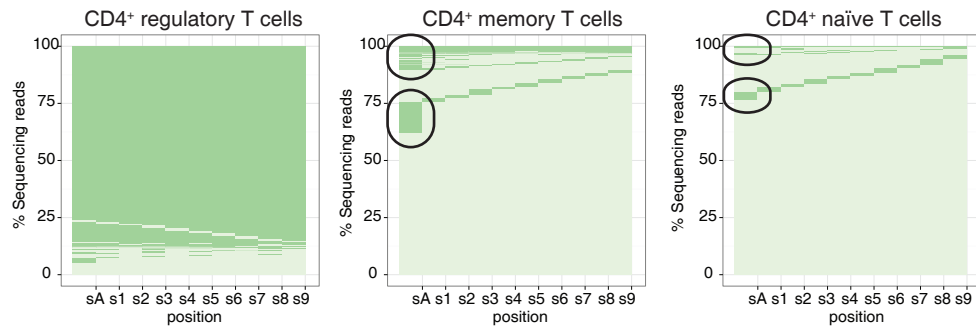

### Male donor - 9 sites analysed

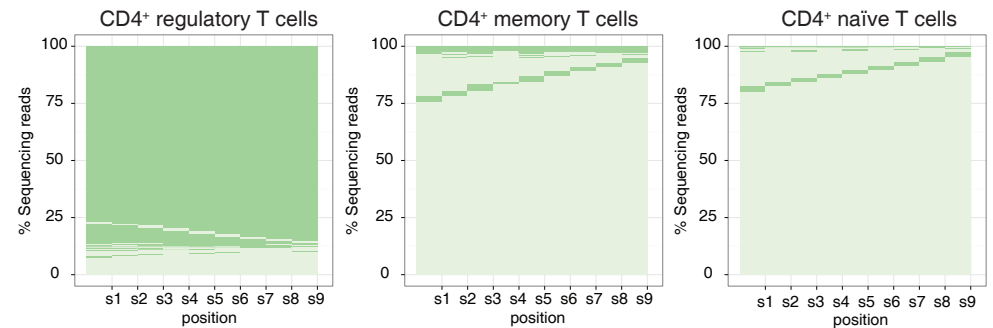

### Female donor - 10 sites analysed

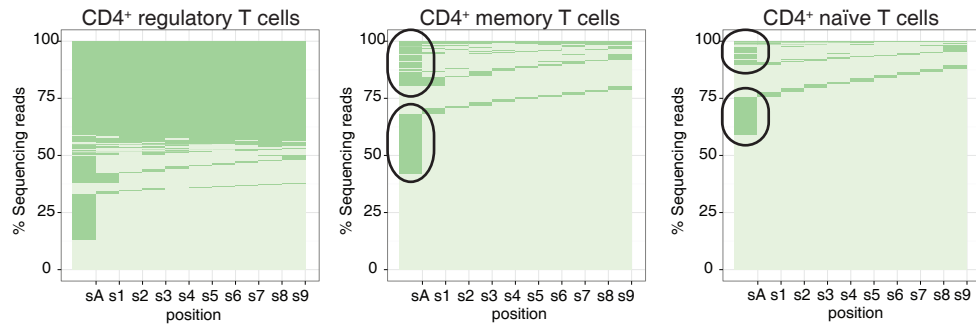

### Female donor - 9 sites analysed

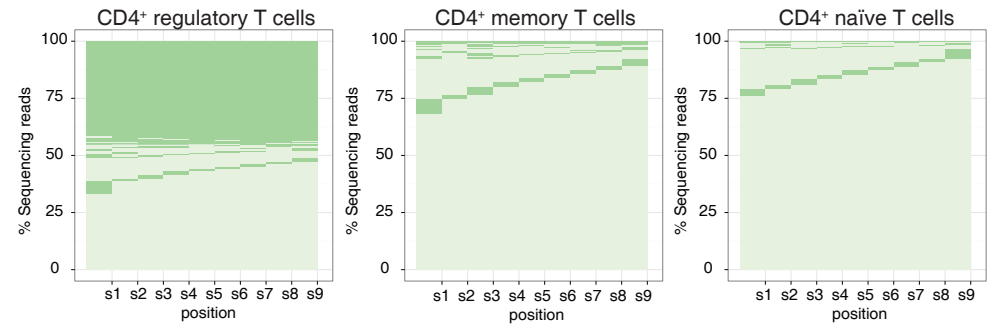

□ = C (methylated)    ■ = T (demethylated)

**Supplemental figure 1:** The *FOXP3* TSDR primers used target 10 CpG sites within the TSDR, nine of which have also been targeted by qPCR (sites numbered 1-9, Ref. 1). Site sA is not included as part of the analysis (black ovals, see Supplemental Methods section 1.14). Representative of two male and two females DNA samples.

1. Wieczorek, G. *Cancer Res* 2009. 69: 599-608.

## Supplemental figure 2

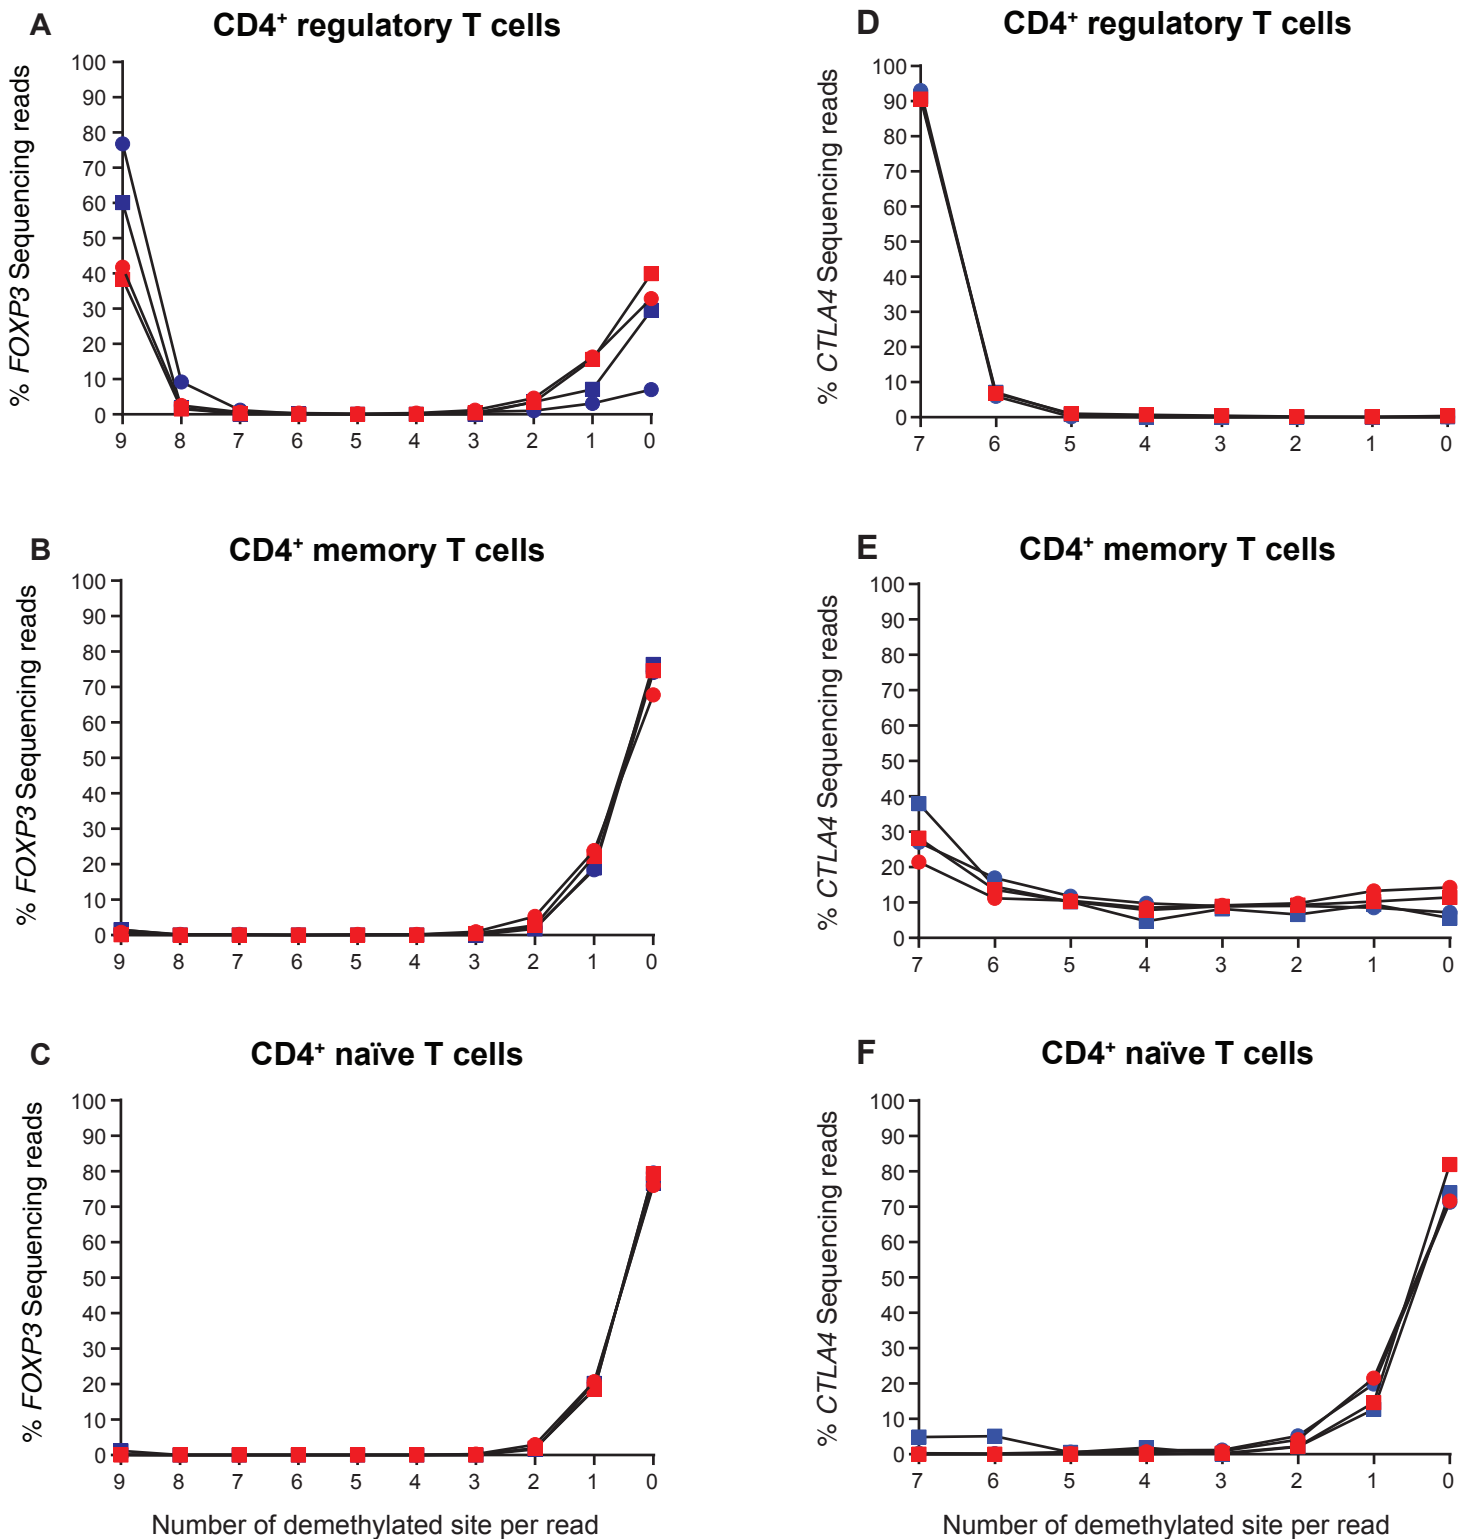

**Supplemental figure 2:** (A-C) The proportion of sequencing reads that contain the indicated number of demethylated (T) sites within each *FOXP3* read was measured from sorted Tregs and naïve and memory CD4<sup>+</sup> T cells from two male (blue square and circle) and two female (red square and circle) donors (Supplemental Methods section 1.14). Supporting Information Table 1 shows percentages and read numbers. (D-F) The proportion of reads that contain the indicated number of demethylated (T) sites within each *CTLA4* read measured from sorted Tregs and naïve and memory CD4<sup>+</sup> T cells from two male (blue square and circle) and two female (red square and circle) donors (Supplemental Methods section 1.14). Supporting Information Table 3 shows percentages and read numbers. The median of between 4 and 8 PCR replicates is displayed.

### Supplemental Figure 3

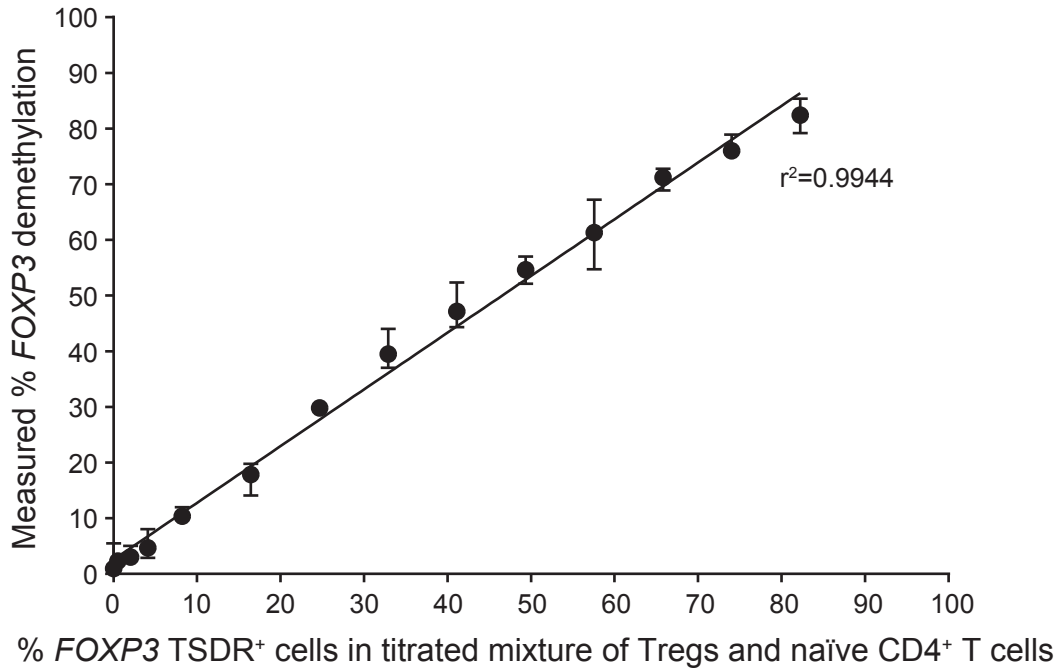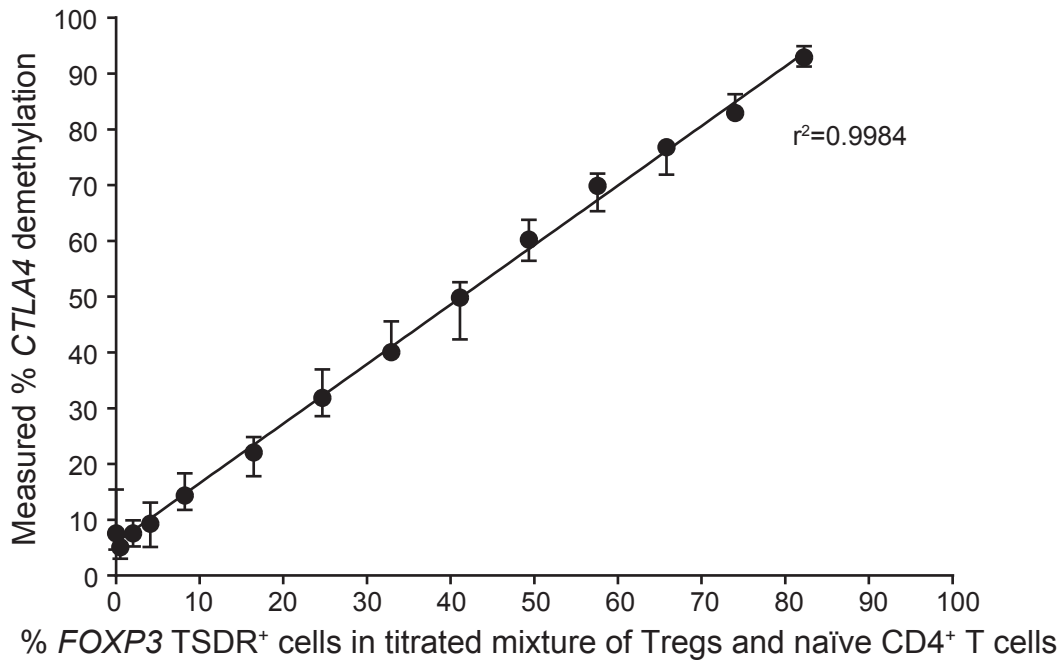

**Supplemental figure 3:** 20,000 cells were sorted from total CD4<sup>+</sup> T cells to generate differing ratios of Tregs and naïve CD4<sup>+</sup> T cells. Six PCR replicates were performed per sample (3300 cells per replicate) and the data shown are the median with range. The Treg sample was 82.3% demethylated at the *FOXP3* TSDR, therefore the highest point graphed on the X axis.

## Supplemental figure 4

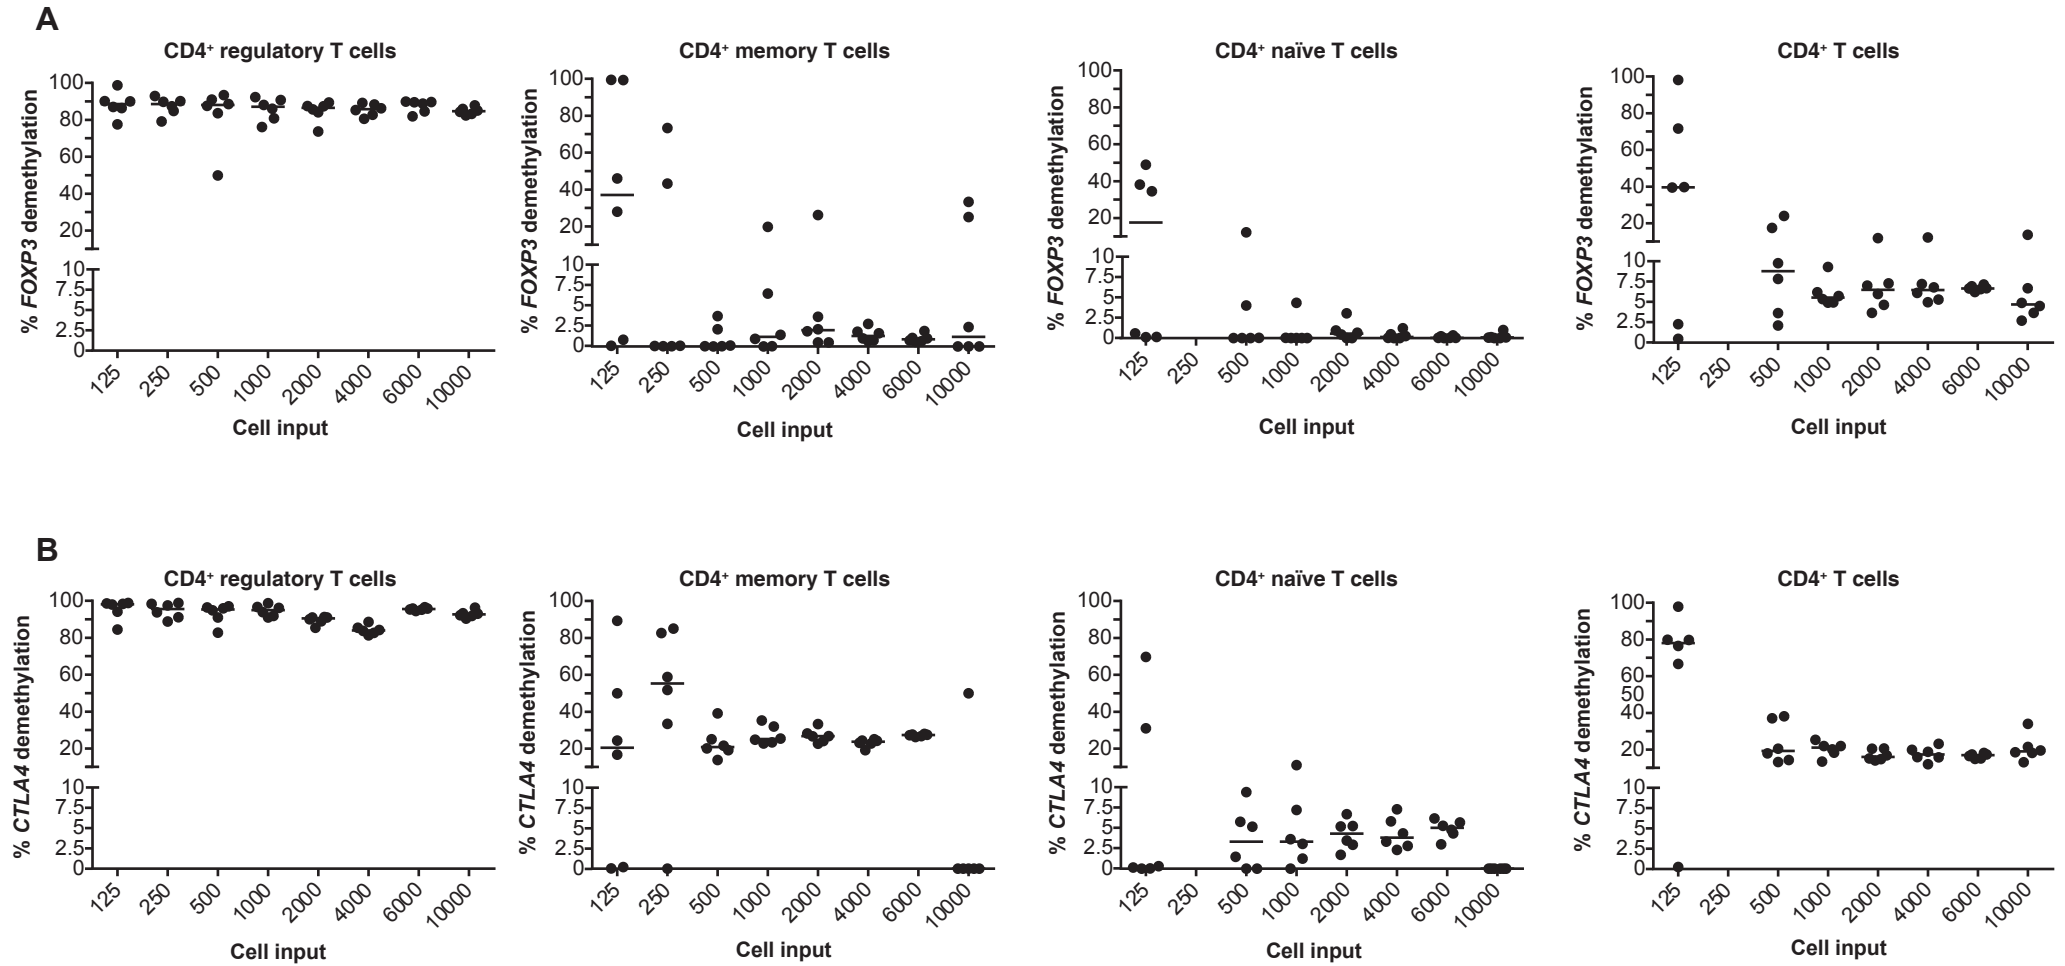

**Supplemental figure 4.** Tregs, memory, naïve and total CD4<sup>+</sup> T cells were sorted and counted by the sorter and then titrated into the multiplexed bisulfite sequencing reaction. The x axis represents the number of cells used per PCR replicate. In each case six replicates were performed from each sorted cell population. Thus, the total number of cells collected for each input is six times the number shown on the x axis. Horizontal line represents the median. Cells were not collected for the naïve and CD4<sup>+</sup> T cell 250 cell point.



## Supplemental figure 5

**A**

| Assay               | Average conversion (%) | SD     | Range (%)  | Number of samples |
|---------------------|------------------------|--------|------------|-------------------|
| <i>FOXP3</i> TSDR   | 99.663                 | 0.0827 | 99.2 - 100 | 1093              |
| <i>CTLA4</i> exon 2 | 99.713                 | 0.0839 | 99.0 - 100 | 767               |

**B**

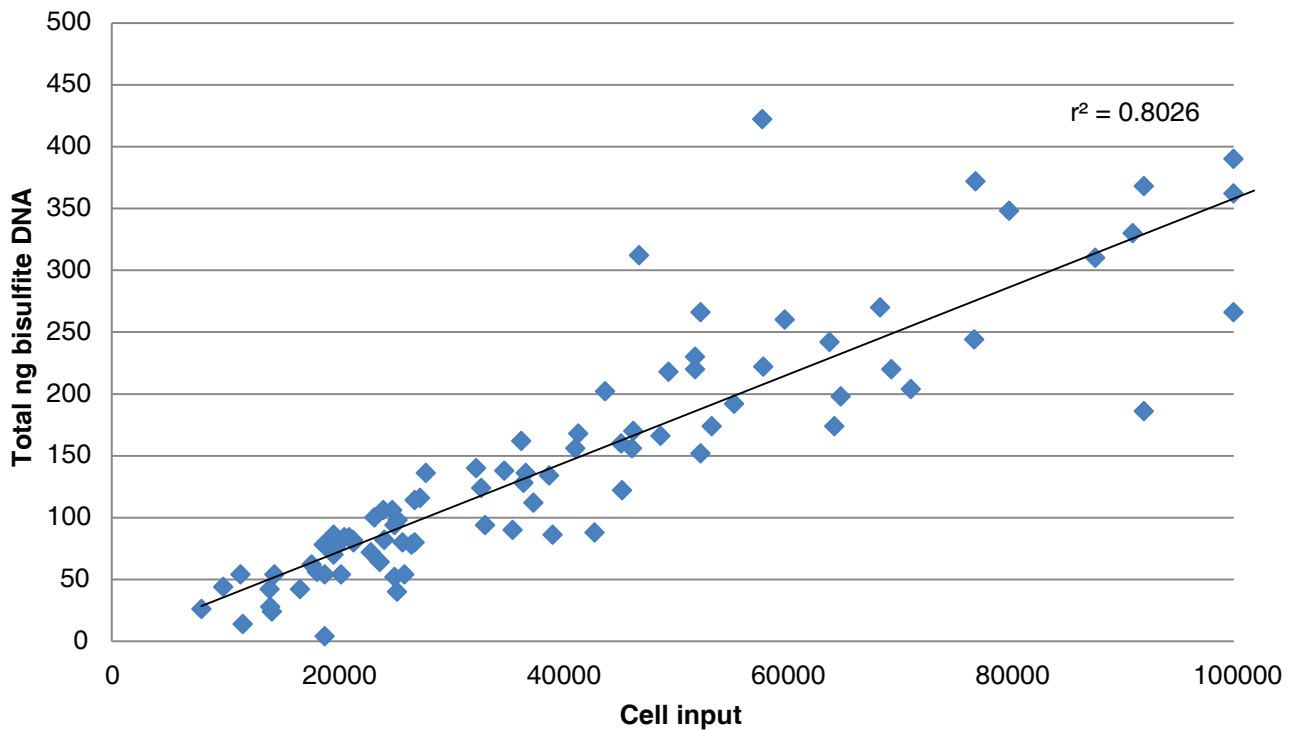

**Supplemental figure 5:** (A) Bisulfite conversion efficiencies for the *FOXP3* and *CTLA4* regions sequenced. (B) Relationship between cell input and quantity of bisulfite DNA extracted using the Qiagen Epitect Fast cell lysis kit (n=87).

### Supplemental figure 6

|       |     |                                                                      |     |
|-------|-----|----------------------------------------------------------------------|-----|
| human | 1   | TGCCCCAGCCTGCTGTGGTACTGGCCAGCAGC <b>CG</b> AGGCAT <b>CG</b> CCAGCTTT | 50  |
|       |     | . . . . . . . . . . . . . . . . . . . . . . . . . . . . .            |     |
| mouse | 1   | TGACCCAACCTTCAGTGGTGTGGCTAGCAGCCATGGTGT <b>CG</b> CCAGCTTT           | 50  |
| human | 51  | GTGTGTGAGTATGCATCTCCAGGCAAAGCCAC---TGAGGT <b>CG</b> GGTGAC           | 97  |
|       |     | . . . . . . . . . . . . . . . . . . . . . . . . . . . . .            |     |
| mouse | 51  | CCATGTGAATATTCACCATCACACAA---CACTGATGAGGT <b>CG</b> GGTGAC           | 97  |
| human | 98  | AGTGCTT <b>CG</b> GCAGGC---TGACAGCCAGGTGACTGAAGTCTGT <b>CG</b> GGCAA | 144 |
|       |     | . . . . . . . . . . . . . . . . . . . . . . . . . . . .              |     |
| mouse | 98  | TGTGCT <b>CG</b> GCAGACAAATGA---CCAAATGACTGAGGTCTGTGCC <b>CGA</b>    | 144 |
| human | 145 | CCT--ACATGATGGGGAATGAGT----TGACCTTCCTAGATGATTCCATC                   | 188 |
|       |     | .                                                                    |     |
| mouse | 145 | CATTCACA-----GAGAA-GAATACAGTGGGCTTCCTAGATTACCCCTTC                   | 188 |
| human | 189 | TGCA <b>CG</b> GGCACCTCCAGTGGAAATCA-AGTGAACCTCACTATCCAAGGAC          | 237 |
|       |     | . . . . . . . . . . . . . . . . . . . . . . . . . . .                |     |
| mouse | 189 | TGCAGTGGTACCTTTAAT-GAAAGCAGAGTGAACCTCACCATCCAAGGAC                   | 237 |
| human | 238 | TGAGGGCCATGGACA <b>CG</b> GGACTCTACATCTGCAAGGTGGA                    | 277 |
|       |     | . . . . . . . . . . . . . . . . . . . . . . . . . .                  |     |
| mouse | 238 | TGAGAGCTGTTGACA <b>CG</b> GGACTGTACCTCTGCAAGGTGGA                    | 277 |

**Supplemental figure 6:** Homology between human and mouse *CTLA4* exon 2 sequences. The region identified as being differentially methylated between conventional T cells and regulatory T cells in mouse (1) was aligned to the human sequence. The CpG sites that are conserved between human and mouse are circled in red, and those that are unique to human are circled in blue. The pairwise sequence aligner, WATER (<http://www.ebi.ac.uk>), was used to perform the alignment.

1. Ohkura, N. *Immunity* 2012. 37: 785-799.

## Supplemental figure 7

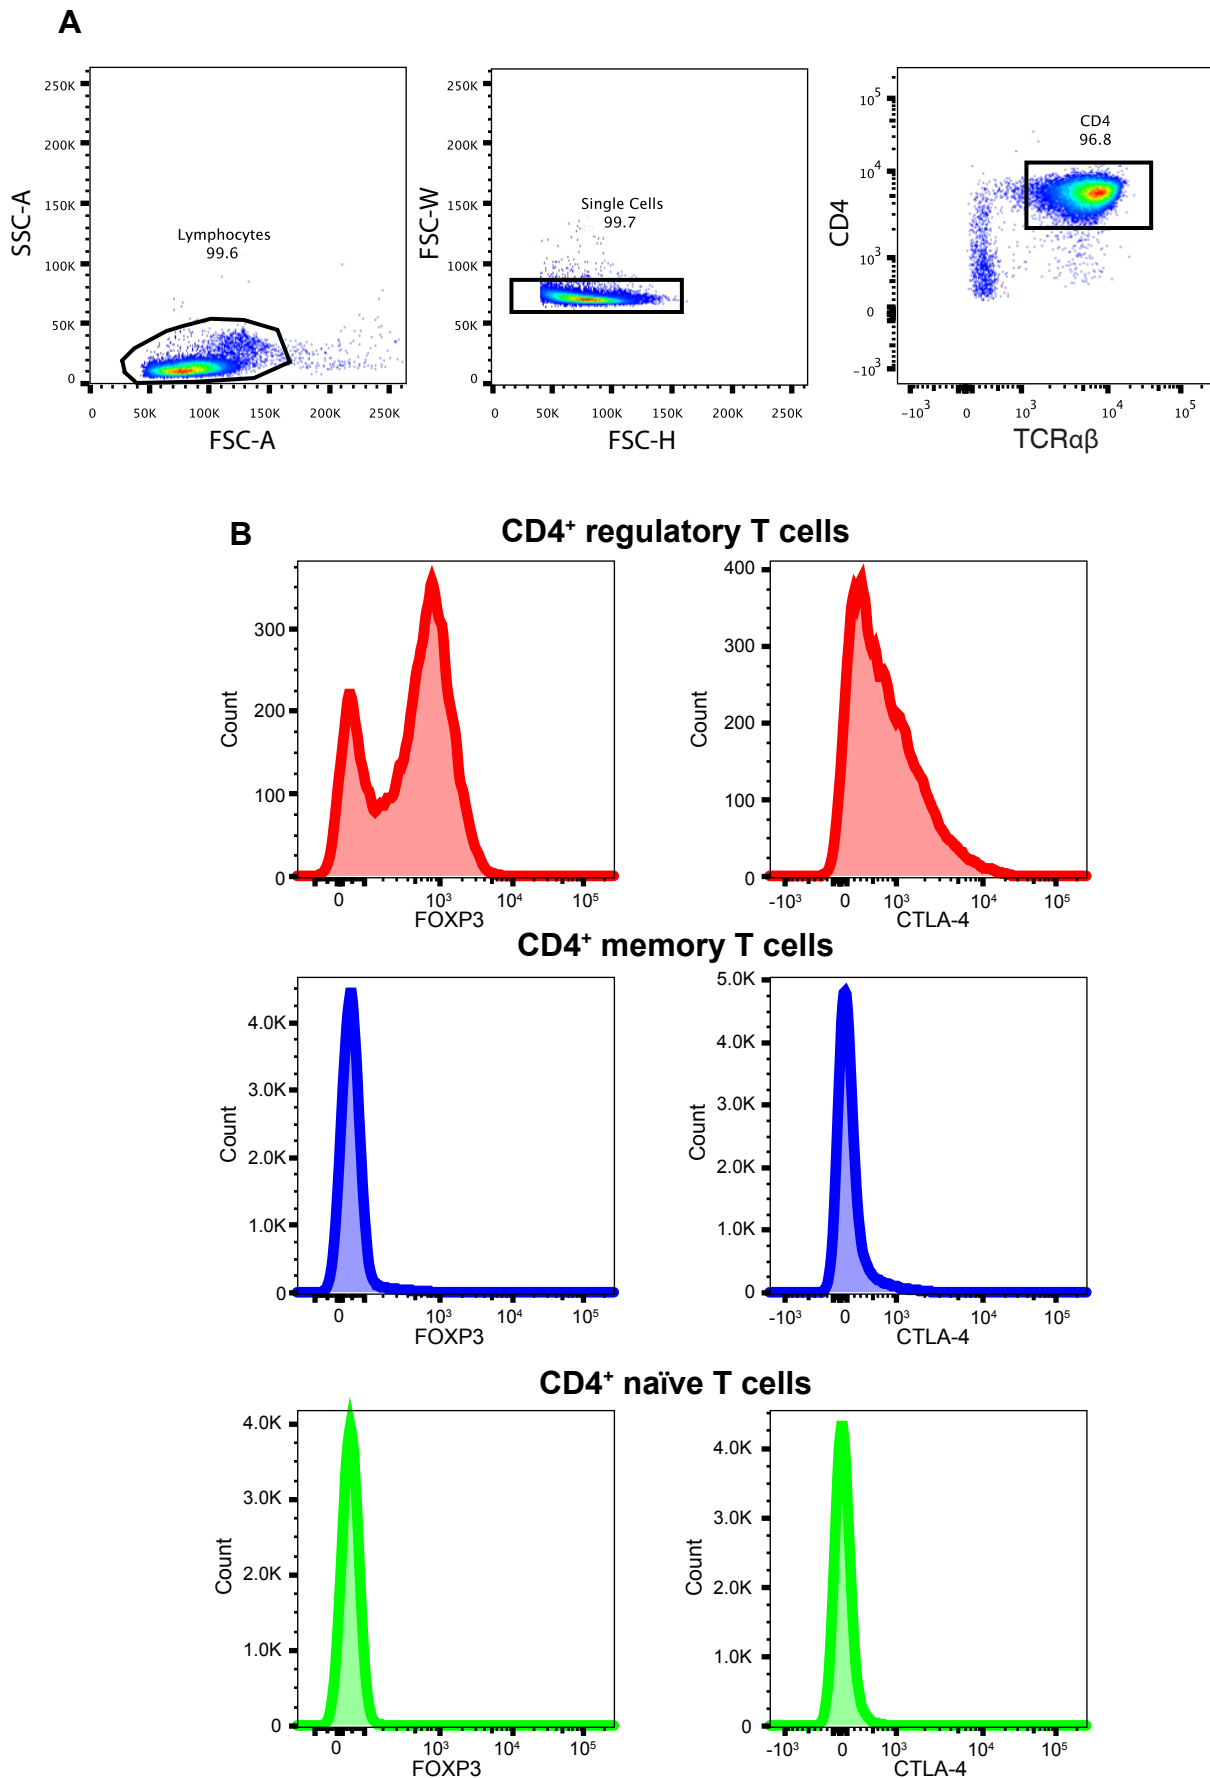

**Supplemental figure 7.** (A) The first steps in the gating strategy used to sort Tregs, memory and naïve CD4 T cells shown in Fig. 1. (B) Representative single parameter histograms showing the expression of FOXP3 and CTLA-4 in Tregs, memory and naïve CD4 T cells defined by the surface markers CD45RA, CD62L, CD127 and CD25 as shown in Fig. 1.

## Supplemental figure 8: Workflow of the lab and bioinformatic protocol

### LAB workflow

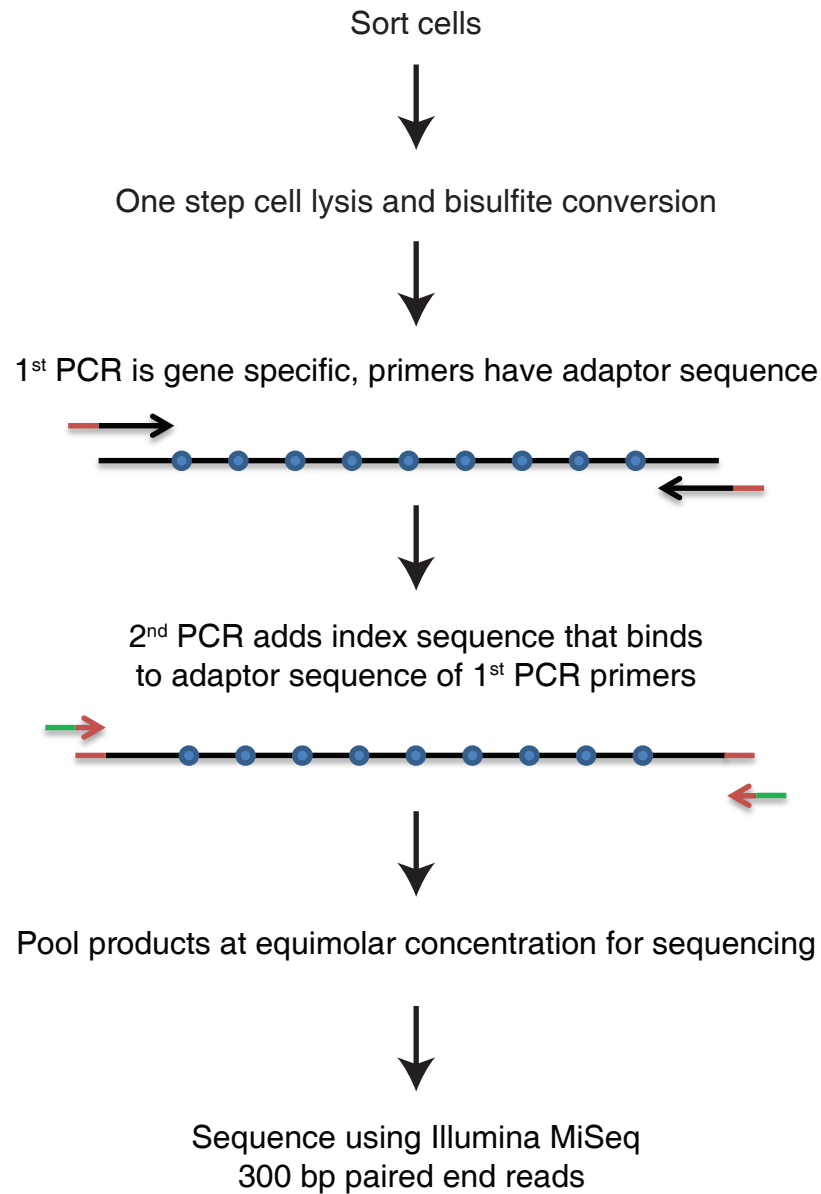

### Bioinformatic workflow

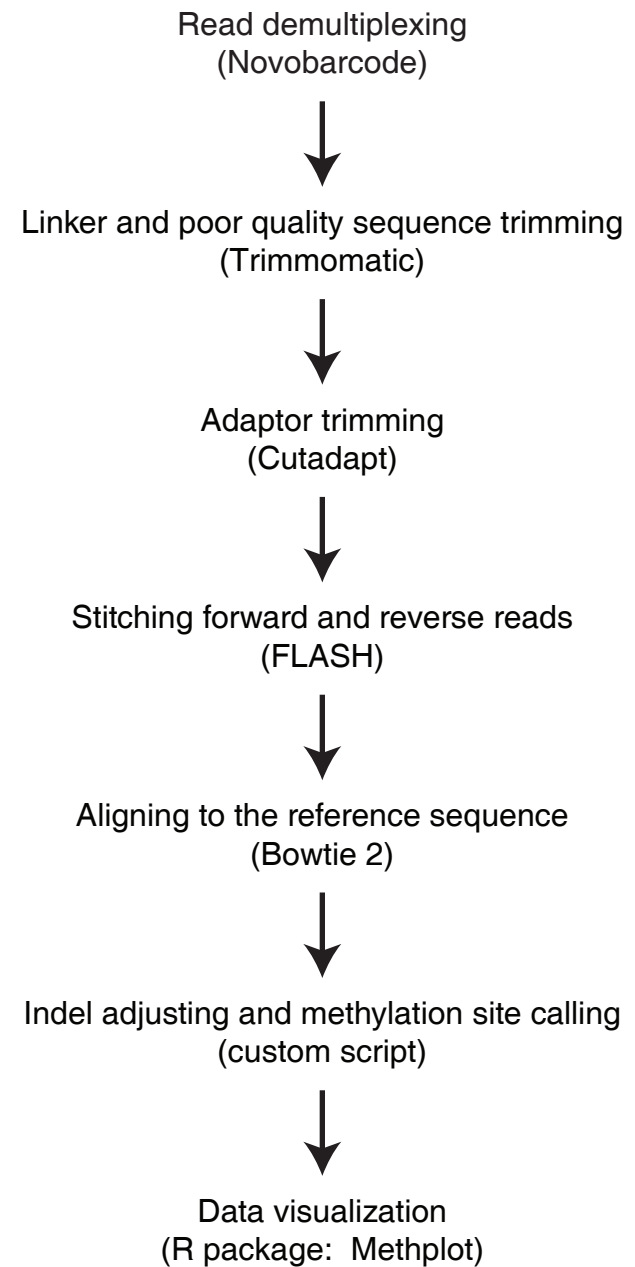

Supplement: EJI-45-3200-s002.pdf [file EJI-45-3200-s002.pdf]
